# Supplementary material for: Influence of anti-osteoporosis treatments on the incidence of COVID-19 in patients with non-inflammatory rheumatic conditions
Source: publisher site journal article supplement (doi:10.18632/aging.104117), 2020-10-20
Supplement: Supplementary file [file aging-v12i20-104117-supplementary-material-SD1.pdf]

## SUPPLEMENTARY TABLES

**Supplementary Table 1. Definition of the comorbidities registered.**

| <b>Comorbidities</b>            | <b>Definition</b>                                                                                                                                                                                                                                                                                       |
|---------------------------------|---------------------------------------------------------------------------------------------------------------------------------------------------------------------------------------------------------------------------------------------------------------------------------------------------------|
| AHT                             | Diagnosis of arterial hypertension in actual treatment with antihypertensive drugs.                                                                                                                                                                                                                     |
| Diabetes                        | Diagnosis of diabetes, treated with diet, oral drugs or insulin administration.                                                                                                                                                                                                                         |
| Pulmonary disease               | Any disease affecting respiratory system functionality and treated with any of the related drugs. Patients suffering from asthma, Chronic obstructive pulmonary disease (COPD), Pulmonary fibrosis, Obstructive sleep apnea syndrome (OSAS) and interstitial lung disease were specifically registered. |
| CV disease                      | Diagnosis of cardiovascular disease                                                                                                                                                                                                                                                                     |
| Chronic kidney disease          | Chronic kidney disease diagnosis, in any of the stages.                                                                                                                                                                                                                                                 |
| Active cancer or treatment      | Patients in a cancer process or in treatment for a previous cancer, along the period studied (1 <sup>st</sup> to the 29 <sup>th</sup> of March)                                                                                                                                                         |
| Tissue or organ transplantation | Any transplantation throughout the patient's life, in actual treatment.                                                                                                                                                                                                                                 |

**Supplementary Table 2. List of types of treatments registered and drugs belonging to each type.**

| <b>Type of treatment</b>     | <b>Drugs included</b>                                                  |                                                 |                     |
|------------------------------|------------------------------------------------------------------------|-------------------------------------------------|---------------------|
| Analgesics                   | NSAIDs                                                                 |                                                 |                     |
|                              | Opioids                                                                |                                                 |                     |
|                              | Pregabalin                                                             |                                                 |                     |
|                              | Gabapentin                                                             |                                                 |                     |
|                              | Other analgesics                                                       |                                                 |                     |
| Antidepressants              | Dual Acting                                                            | Duloxetine<br>Venlafaxine<br>Others             |                     |
|                              | Tricyclic                                                              | Amitriptyline<br>Other                          |                     |
|                              |                                                                        | Selective serotonin reuptake inhibitors (SSRIs) |                     |
|                              |                                                                        | Reboxetine                                      |                     |
|                              |                                                                        | Other antidepressants                           |                     |
|                              | Antiresorptive Agents                                                  | Bisphosphonates                                 | Oral<br>Intravenous |
|                              |                                                                        |                                                 | Denosumab           |
|                              |                                                                        | Selective estrogen receptor modulator (SERM)    |                     |
| Anabolic Agents              | Teriparatide                                                           |                                                 |                     |
| Supplements for osteoporosis | Calcium                                                                |                                                 |                     |
|                              | Vitamin D (in any of its forms or metabolites)                         |                                                 |                     |
|                              | Thiazides diuretics                                                    |                                                 |                     |
| Corticoids                   | Any type of oral corticoid (all converted to prednisone dose)          |                                                 |                     |
|                              | Any type of inhaled corticoids                                         |                                                 |                     |
| Antihypertensive drugs       | Angiotensin-converting enzyme (Enalapril, Ramipril, Lisinopril, ...)   |                                                 |                     |
|                              | Angiotensin II Receptor Blockers (Losartan, Valsartan, Candesartan...) |                                                 |                     |

**Supplementary Table 3. Relative risk (RR) and 95% confidence interval (95% CI) of hsCOVID-19 after propensity score matching.**

| Sample size                                | Denosumab        |         |           | Intravenous Zoledronate |         |           | Calcium          |         |           |
|--------------------------------------------|------------------|---------|-----------|-------------------------|---------|-----------|------------------|---------|-----------|
|                                            |                  | control | treated   |                         | control | treated   |                  | control | treated   |
| N All                                      | 1838             | 264     |           | N All                   | 1923    | 179       | N All            | 1612    | 490       |
| N matched                                  | 264              | 264     |           | N matched               | 179     | 179       | N matched        | 490     | 490       |
| N unmatched                                | 1574             | 0       |           | N unmatched             | 1744    | 0         | N unmatched      | 1122    | 0         |
| <b>COVID-19 (matched data)</b>             | Yes              | 11      | 8         | Yes                     | 11      | 6         | Yes              | 22      | 16        |
|                                            | No               | 253     | 256       | No                      | 168     | 173       | No               | 468     | 474       |
| <b>Crude RR (95%CI)</b>                    | 0.73 (0.30-1.78) |         |           | 0.55 (0.20-1.44)        |         |           | 0.72 (0.39-1.37) |         |           |
| <b>Adjusted RR (95%CI)*</b>                | 0.87 (0.30-2.52) |         |           | 0.43 (0.14-1.35)        |         |           | 0.67 (0.36-1.27) |         |           |
| <b>Summary of balance for matched data</b> | Means            | Means   | Mean Diff | Means                   | Means   | Mean Diff | Means            | Means   | Mean Diff |
|                                            | Treated          | Control |           | Treated                 | Control |           | Treated          | Control |           |
| Osteoporosis                               | 0.97             | 0.97    | 0.00      | 0.92                    | 0.92    | 0.00      | 0.77             | 0.77    | 0.00      |
| Women                                      | 0.86             | 0.86    | -0.01     | 0.77                    | 0.80    | -0.03     | 0.85             | 0.88    | -0.02     |
| Age                                        | 74.05            | 73.29   | 0.76      | 71.61                   | 71.69   | -0.08     | 71.34            | 71.57   | -0.22     |
| CV disease                                 | 0.17             | 0.13    | 0.04      | 0.18                    | 0.17    | 0.02      | 0.17             | 0.16    | 0.01      |
| Diabetes                                   | 0.12             | 0.10    | 0.02      | 0.18                    | 0.17    | 0.01      | 0.10             | 0.12    | -0.02     |
| Pulmonary disease                          | 0.20             | 0.21    | -0.01     | 0.19                    | 0.17    | 0.02      | 0.16             | 0.14    | 0.01      |
| Renal disease                              | 0.11             | 0.09    | 0.01      | 0.08                    | 0.04    | 0.03      | 0.07             | 0.06    | 0.01      |
| Cancer                                     | 0.09             | 0.08    | 0.02      | 0.15                    | 0.15    | 0.01      | 0.08             | 0.08    | 0.00      |

CV= cardiovascular.

\*RR for denosumab is adjusted by the exposure to calcium, bisphosphonates, vitamin D, thiazide, analgesics, dual antidepressants, tricyclic antidepressants, SSRI antidepressants (selective serotonin reuptake inhibitors), glucocorticoids, anti-hypertensive drugs and NSAIDs. RR for intravenous zoledronate is adjusted by the exposure to denosumab, oral bisphosphonates, calcium, vitamin D, thiazide, analgesics, dual antidepressants, tricyclic antidepressants, SSRI antidepressants, glucocorticoids, anti-hypertensive drugs and NSAIDs. RR for calcium is adjusted by the exposure to denosumab, bisphosphonates, vitamin D, thiazide, analgesics, dual antidepressants, tricyclic antidepressants, SSRI antidepressants, glucocorticoids, anti-hypertensive drugs and NSAIDs.
